# Supplementary material for: Hyperactivity/restlessness is associated with increased functional connectivity in adults with ADHD: a dimensional analysis of resting state fMRI
Source: PubMed Central journal article supplement (PMC6347794; doi:10.1186/s12888-019-2031-9), 2019-01-25
Supplement: 12888_2019_2031_MOESM1_ESM.pdf [file 12888_2019_2031_MOESM1_ESM.pdf]

R

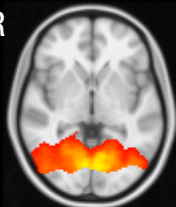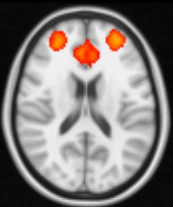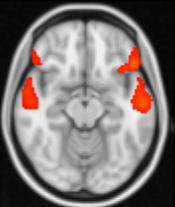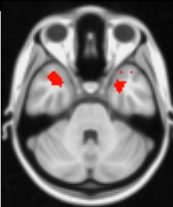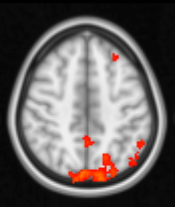

920

1120

1220

1420

1520

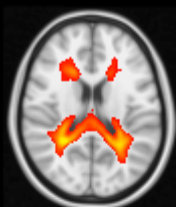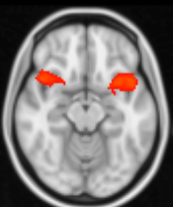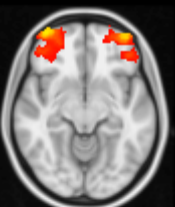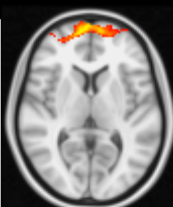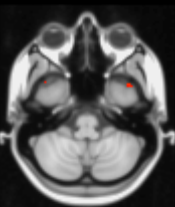

1620

1720

1820

1920

2020
